# Supplementary material
Source: publisher figshare collection journal article supplement (https://acs.figshare.com/ndownloader/files/3877501)
Supplement: Supplementary file 1 [file 3877501]

## Sheet: Sheet1
Supporting Information for
Improving docking results through re-ranking of diverse poses using MM-GBSA
P. A. Greenidge,a,*C. Kramer,b J.-C. Mozziconacci,cW. Shermand
a) Novartis Institutes for Biomedical Research, Novartis Pharma AG, Forum 1, Novartis Campus, CH 4056 Basel, Switzerland
b) University of Innsbruck, Center for Chemistry and Biomedicine, Institute for General, Inorganic and Theoretical Chemistry, Innrain 82, 6020 Innsbruck, Austria
c) Schrödinger GmbH, Dynamostrasse 13, 68165 Mannheim, Germany
d) Schrödinger Inc., 120 West 45th Street, New York, NY 10036, USA
* Corresponding author: Email: Paulette.Greenidge@novartis.com
FAB	PDBID			MM-GBSA (kcal/mol) (including ligand strain)		MM-GBSA (kcal/mol (NS)											PDBID			MM-GBSA (kcal/mol) (including ligand strain)	MM-GBSA (kcal/mol (NS)
	1aj7		RMSD		RANK MM-GBSA (strain)												1fl3		RMSD
	xray	RANK CHEMPLP	0	-65.6		-70.3											xray		0	-90.7	-93.1
score	83.12	1	0.66	-68.4	1	-73.3											95.55		0.51	-91	-93.3
	83.08	2	0.6	-68.2	2	-73.3											92.91		0.81	-87.7	-91
	78.79	3	0.73	-67.9	3	-70.9
	76.25	4	2.87	-54.9	9	-60.5
	76.24	5	0.66	-63.6	5	-69.5
	75.95	6	2.74	-54.8	10	-60.6
	75.89	7	0.91	-62.8	6	-69.5
	75.67	8	2.85	-60.4	8	-63.5
	75.36	9	1.29	-67.5	4	-73.2
	72.79	10	2	-62.6	7	-67.3
	71.4	11	2.28	-54.5	11	-63.5
FXA	PDBID			MM-GBSA (kcal/mol) (including ligand strain)		MM-GBSA (kcal/mol (NS)		PDBID		RMSD	MM-GBSA (kcal/mol) (including ligand strain)		MM-GBSA (kcal/mol (NS)		PDBID		RMSD		MM-GBSA (kcal/mol) (including ligand strain)	MM-GBSA (kcal/mol (NS)
	1mq6		RMSD		RANK MM-GBSA (strain)			1ezq				RANK MM-GBSA (strain)			1lpz			RANK MM-GBSA (strain)
	xray	RANK CHEMPLP	0	-133.4		-137.4		xray	RANK CHEMPLP	0	-115.6		-123.4		xray	RANK CHEMPLP	0		-122.89	-127.44
score	103.16	1	0.71	-131.8	1	-136.4		96.98	1	1.86	-91.4	8	-112.5		109.81	1	0.58	5	-117.3	-131.8
	103.15	2	1.62	-121.1	3	-127.1		94.41	2	1.46	-103.9	4	-118.7		103.38	2	0.85	6	-114.7	-127.9
	97.05	3	1.36	-125.8	2	-131.4		90.25	3	1.41	-103.5	5	-119.8		101.87	3	0.69	1	-123	-127.5
	87.24	4	2.32	-106.1	4	-113.4		89.12	4	2.33	-112.8	1	-123.5		101.38	4	0.5	2	-123	-127.6
	83.04	5	6.03	-88.9	5	-101.2		88.2	5	2.81	-71.7	13	-86.1		91.05	5	0.89	3	-122.8	-127.5
	73.89	6	7.23	-78.9	7	-86		88.12	6	4.18	-62	20	-69.3		89.51	6	1.83	7	-96.2	-115.5
	73.05	7	7.13	-70.8	21	-84		87.72	7	2.56	-100.1	6	-117.5		84.48	7	1.92	8	-94.7	-115.3
	70.96	8	7.77	-80	6	-84.3		87.41	8	2.17	-105.9	3	-119.4		83.38	8	1.39	4	-122	-127.4
	70.71	9	7.13	-78.4	8	-86		86.82	9	4.57	-77.8	9	-83.8		80.13	9	7.33	22	-63.6	-70.1
	70.36	10	7.64	-78.3	9	-81.6		86.53	10	2.93	-58.4	24	-75.6		78.61	10	7.23	21	-64.5	-68.6
	70.31	11	6.74	-72.1	15	-84.8		86.44	11	3.31	-69	16	-84.8		77.8	11	4.99	18	-66.8	-88.1
	69.61	12	6.72	-70.8	21	-83.4		85.72	12	3.61	-50.9	34	-62		75.23	12	2.25	9	-93.1	-113.1
	69.36	13	6.8	-70.9	20	-83.5		85.57	13	3.79	-69.6	14	-75.5		75.19	13	9.89	11	-72.4	-77.8
	69.31	14	6.77	-71.7	19	-83.8		84.41	14	7.32	-38.8	44	-55.9		75.16	14	5.04	10	-72.9	-91.4
	68.73	15	7.82	-67.3	25	-78.2		84.18	15	2.19	-109.9	2	-119.8		73.62	15	7.4	25	-61	-66.1
	69.48	16	8.46	-71.3	16	-79.5		83.58	16	5.48	-55.7	29	-66.4		72.59	16	7.13	16	-68.5	-78.1
	68.47	17	6.61	-75.9	13	-84		83.1	17	3.42	-67.1	17	-75.7		72.22	17	5.7	28	-56.5	-72
	68.21	18	7.61	-76.9	11	-84.7		83.03	18	3.92	-56.9	26	-62.9		72.02	18	5.19	12	-72	-78.2
	68.08	19	7.9	-67.8	23	-77.8		83.35	19	10.17	-62	21	-77.7		72.01	19	5.4	23	-62.5	-72.8
	67.74	20	8.36	-71	18	-78		81.52	20	2.9	-92.8	7	-115.8		70.78	20	6.84	19	-64.8	-74
	67.71	21	8.13	-71.3	16	-78.8		80.95	21	9.78	-76	12	-91.3		70.08	21	9	13	-71.2	-83.1
	67.43	22	8	-66.8	26	-79.4		80.42	22	2.99	-69.5	15	-84.3		68.05	22	7.31	24	-61.7	-73.5
	66.87	23	8.78	-76.3	12	-81		79.78	23	10.07	-76.8	11	-90.6		67.85	23	7.53	27	-56.8	-61.5
	64.17	24	7.23	-77.3	10	-83.8		78.23	24	9.53	-56.8	27	-73.3		67	24	6.95	20	-64.6	-74
	64.1	25	7.2	-67.6	24	-75		78.17	25	9.52	-66.2	18	-79.8		66.49	25	6.36	15	-70.6	-75.4
	59.76	26	8.24	-64.2	27	-70.8		77.69	26	6.4	-44.9	42	-60.1		64.4	26	5.91	14	-70.7	-75.4
	56.74	27	6.94	-72.3	14	-78.9		77.56	27	5.77	-46.3	41	-65.2		64.14	27	6.19	26	-58.3	-64.1
								76.58	28	10.39	-59.5	23	-68.9		63.34	28	10.15	17	-67.7	-75.9
								76.04	29	9.73	-56.2	28	-72		60.94	29	7.85	29	-55.5	-61.9
								75.86	30	9.54	-65.8	19	-85
								74.62	31	10.34	-50.3	35	-56.7
								74.54	32	10.37	-61.6	22	-71.1
								74.3	33	10.88	-54.1	30	-69.4
								73.98	34	10.49	-77.1	10	-93.5
								73.7	35	10.98	-48.9	38	-54.7
								73.41	36	5.95	-48.1	40	-60.1
								72.98	37	10.42	-50.3	36	-60.6
								71.66	38	10.48	-50	37	-57.3
								70.39	39	10.16	-53	31	-62.5
								69.86	40	10.39	-48.4	39	-57.1
								69.84	41	8.75	-51.9	32	-59.8
								69.45	42	10.5	-58.2	25	-68.6
								69.33	43	9.06	-51.4	33	-64
								68.61	44	10.41	-42.6	43	-56.1
LACTAMASE	PDBID
	1l2s		RMSD	MM-GBSA (kcal/mol) (including ligand strain)		MM-GBSA (kcal/mol (NS)
	xray	RANK CHEMPLP	0	-58.3	RANK MM-GBSA (strain)	-63.2
score	55.9	1	1.41	-45.6	1	-52.6
	54.12	2	2.74	-43.9	2	-50.1
	53.99	3	2.61	-37.9	3	-39.6
	51.79	4	2.51	-43.9	4	-50.2
	47.15	5	6.86	-40.8	5	-41.1
Nuclear Hormone Receptors	PDBID			MM-GBSA (kcal/mol) (including ligand strain)		MM-GBSA (kcal/mol (NS)
	1fcx		RMSD
	XRAY		0	-148.6		-152.5
score	119.18		0.44	-144.1		-149.7
	1fcz		RMSD	MM-GBSA (kcal/mol) (including ligand strain)		MM-GBSA (kcal/mol (NS)
	xray		0	-149.4		-151.5
	111.18		0.49	-147.4		-149.6
	1n46		RMSD	MM-GBSA (kcal/mol) (including ligand strain)		MM-GBSA (kcal/mol (NS)
	xray		0	-127.5		-130.6
	109.48		0.22	-127.6		-130.6
aminohydrolase	1ai5		RMSD	MM-GBSA (kcal/mol) (including ligand strain)	RANK MM-GBSA (strain)	MM-GBSA (kcal/mol (NS)
	xray	RANK CHEMPLP	0	-36.9		-37.6
	48.02	1	0.64	-36.9	2	-37.5
	48	2	0.71	-37	1	-37.7
	47.58	3	0.67	-36.8	3	-37.6
	47.46	4	0.55	-36.5	4	-37.5
cdk2
	1h1p			MM-GBSA (kcal/mol) (including ligand strain)		MM-GBSA (kcal/mol (NS)
	xray	RANK CHEMPLP	0	-63	RANK MM-GBSA (strain)	-66.2
	58.33	1	0.55	-64.4	1	-65.7
	57.37	2	2.95	-61.7	2	-65.6
	56.28	3	3	-59.4	3	-62.9
	1h1s			MM-GBSA (kcal/mol) (including ligand strain)		MM-GBSA (kcal/mol (NS)
	xray	RANK CHEMPLP	0	-81.4	RANK MM-GBSA (strain)	-85.9
	76.92	1	0.73	-77.4	3	-77.3
	76.86	2	0.46	-75.5	4	-82.8
	75.89	3	0.59	-80.3	1	-84.5
	69.22	4	1.85	-79.8	2	-84.2
	68.18	5	2.4	-36.2	5	-58.6
	75.54		0.9
PNP	1v48			MM-GBSA (kcal/mol) (including ligand strain)		MM-GBSA (kcal/mol (NS)
	xray	RANK CHEMPLP	0	-81.5	RANK MM-GBSA (strain)	-84.6
	96.05	1	0.9	-81.8	3	-85.3
	94.97	2	0.5	-78	7	-82.8
	93.99	3	0.39	-78.1	6	-82.7
	93.66	4	0.98	-76.3	9	-82.3
	92.82	5	0.63	-81.9	2	-84.7
	91.84	6	0.65	-82.1	1	-85.6
	91.37	7	0.75	-79.3	4	-83.9
	89.13	8	0.61	-76.4	8	-81.3
	78.01	9	0.93	-64.4	10	-70.6
	74.1	10	4.71	-54.5	11	-58.8
	73.5	11	0.97	-78.5	5	-81.2
	70.9	12	4.11	-37.3	16	-39.3
	67.79	13	6.41	-51.1	13	-59.1
	66.86	14	6.16	-53.5	12	-59.3
	66.6	15	4.74	-50.7	14	-55.1
	66.4	16	4.43	-43	15	-45.2
	63.55	17	7.59	-12.5	18	-16.5
	58.61	18	6.9	-27.8	17	-37.3
ricin	1br6			MM-GBSA (kcal/mol) (including ligand strain)		MM-GBSA (kcal/mol (NS)
	xray	RANK CHEMPLP	0	-44.1	RANK MM-GBSA (strain)	-47.6
	74.96	1	0.49	-44.8	1	-47.7
	73.94	2	0.46	-44.5	2	-47.6
	72.36	3	1.93	-37.7	4	-40.7
	69.25	4	0.8	-36.1	5	-44.3
	68.57	5	1.44	-43.7	3	-47
	62.46	6	6.32	-18.5	6	-27.5
	62.25	7	6.83	-6.6	15	-9.9
	61.93	8	6.47	-14.2	12	-24.2
	61.75	9	7.76	-13.4	13	-20.8
	61.51	10	6.96	-0.7	18	-6.5
	60.97	11	6.74	-16.1	10	-20.7
	60.11	12	6.47	-18.3	7	-27.5
	59.72	13	7.46	-14.5	11	-27
	59.58	14	7.61	-3.8	17	-17.8
	59.35	15	7.07	-0.4	19	-9.2
	58.95	16	6.27	-17.8	8	-277.4
	58.64	17	7.6	-16.5	9	-20.7
	57.9	18	6.87	-5.9	16	-9.8
	54.91	19	9.2	-12.8	14	-17.8
TGT	1n2v			MM-GBSA (kcal/mol) (including ligand strain)		MM-GBSA (kcal/mol (NS)
	xray	RANK CHEMPLP	0	-55.95	RANK MM-GBSA (strain)	-56.4
	55.44	1	3.02	-53.24	3	-55.8
	54.78	2	2.65	-54.51	2	-55.2
	54.01	3	2.79	-53.17	4	-55.8
	53.95	4	1.28	-52.45	5	-55.7
	53.87	5	0.8	-56.34	1	-57.5
	53.52	6	1.69	-51.29	6	-56.2
TRYPSIN	1f0u			MM-GBSA (kcal/mol) (including ligand strain)		MM-GBSA (kcal/mol (NS)
	xray	RANK CHEMPLP	0	-93.5	RANK MM-GBSA (strain)	-101.1
	83.95	1	1.91	-85.1	1	-96.5
	83.56	2	6.066	-84.9	2	-91.7
	74.16	3	8.71	-55.7	13	-64.6
	71.55	4	9.24	-55.4	15	-62.9
	71.16	5	8.69	-53.9	17	-64.8
	70.83	6	8.81	-57.9	7	-67.8
	70.24	7	5	-62.9	4	-71.6
	70.02	8	8.97	-49.6	26	-58.3
	69.67	9	8.95	-51.3	20	-56.5
	69.63	10	10.17	-54.7	16	-61.3
	69.32	11	9.1	-57.5	10	-67.4
	69.05	12	9.11	-57.9	8	-62.5
	68.9	13	9	-46	32	-57.2
	68.8	14	9.08	-44.6	34	-59.6
	68.67	15	8.75	-50.7	22	-60
	68.05	16	9.04	-49.9	24	-57.1
	67.99	17	3.5	-71.6	3	-81.2
	67.95	18	10.22	-56.2	12	-61.7
	67.84	19	9.2	-57.9	9	-67.9
	67.75	20	10.3	-53.9	18	-60.3
	67.72	21	9.37	-49.2	29	-54.7
	67.47	22	9.03	-52.4	19	-57.2
	65.92	24	10.5	-59.1	5	-60.3
	65.92	23	10.07	-55.7	14	-71.1
	65.62	25	9.31	-49.4	28	-59.3
	65.35	26	9.07	-51.3	21	-61.3
	64.64	27	9.43	-47.9	31	-56
	64.5	28	4.8	-58.8	6	-72.3
	64.39	29	10.23	-43	36	-49
	64.15	31	9.24	-49	30	-57.7
	64.08	32	10.02	-56.6	11	-52.8
	64.08	30	9.87	-45.1	33	-64.9
	63.91	33	9.07	-43.5	35	-56.5
	63.54	34	9.11	-49.5	27	-57.2
	62.46	35	9.46	-50.4	23	-57
	61.35	36	9.66	-42.6	37	-47.9
	61.21	37	10.27	-49.8	25	-57
	59.89	38	6.17	-40.3	38	-46
	54.93	39	10.36	22.7	39	-46.7
				MM-GBSA (kcal/mol) (including ligand strain)		MM-GBSA (kcal/mol (NS)
	2tpi
trypsinogen	xray		0	-70.8		-75.1
	69.43		0.54	-74.6		-76.9
	66.9		0.62	-74.8		-76.9
	1fhd			MM-GBSA (kcal/mol) (including ligand strain)		MM-GBSA (kcal/mol (NS)
xylanase	xray		0	-84.5		-89.5
	58.94		5.75	-46.9		-52.4
	58.68		4.86	-38		-46.6
	58.29		1.88	-60.7		-71.4
	55.5		6.59	-54.4		-61
	55.3		5.56	-56.4		-63.2
	54.72		6.4	-53.9		-59.2
	54.55		4.53	-49.2		-55.8
	53.91		3.88	-37.5		-45.3
	52.94		5.41	-54.6		-60.01
	51.41		4.07	-41.6		-54.6
	1fh9			MM-GBSA (kcal/mol) (including ligand strain)		MM-GBSA (kcal/mol (NS)
	xray		0	-85.4		-96.8
	54.67		1.55	-53.8		-62.8
	52.89		2.5	-39.7		-56.2
	52.48		3.07	-41.9		-53.4
	52.46		2.77	-45.3		-58
	51.23		2.5	-46		-58
	50.08		2.81	-47.6		-59
	49.63		6.01	-25.4		-46.4
	49.4		3.01	-44.9		-57.9
	47.6		6.39	-25.7		-36.2
	47.37		6.1	-25		-30.5
	46.73		5.92	-27.5		-36.2
	45.63		6.24	-24.7		-32.2
	45.39		5.04	-30.3		-38.3
	44.1		6.53	-30.4		-41
	42.75		6.58	-24.9		-31.7
	41.3		6.86	-14.7		-24.6
	41.23		6.96	-17.4		-23.1
	1fh8			MM-GBSA (kcal/mol) (including ligand strain)		MM-GBSA (kcal/mol (NS)
	xray		0	-69		-71.5
	62.4		2.61	-56.9		-66.7
	61.84		2.59	-56.1		-65.1
	61.8		1.82	-53.9		-62.7
	61.44		2.78	-55.9		-72
